# Supplementary material
Source: HighWire-hosted journal article supplement (https://annals.highwire.org/content/suppl/2004/04/01/140.7.557)
Supplement: 140-7-557-DC1-1.pdf [file 140-7-557-DC1-1.pdf]

**Table 2. Components of Interventions and Alcohol Outcomes among Adult Alcohol Intervention Trials, by Intervention Intensity\***

| Intervention Condition†                        | Population                                                                  | Setting/Duration                                                                                                           | Intervention                                                                                                                                                                | Outcomes                                                                                                                                                                                                                                                                                                                         | Study Quality                                                                                                                                            |
|------------------------------------------------|-----------------------------------------------------------------------------|----------------------------------------------------------------------------------------------------------------------------|-----------------------------------------------------------------------------------------------------------------------------------------------------------------------------|----------------------------------------------------------------------------------------------------------------------------------------------------------------------------------------------------------------------------------------------------------------------------------------------------------------------------------|----------------------------------------------------------------------------------------------------------------------------------------------------------|
| <b>Very brief intervention conditions</b>      |                                                                             |                                                                                                                            |                                                                                                                                                                             |                                                                                                                                                                                                                                                                                                                                  |                                                                                                                                                          |
| Richmond et al. (61)‡                          | 378 adults age 18–70 y; baseline mean alcohol consumption: 38.5 drinks/wk   | 40 Australian primary care practices (119 physicians)<br><br>Outcomes assessed at 12 mo                                    | Group 1: alcohol assessment placed on chart before visit ( <i>n</i> = 93)<br><br>Group 2: Same as group 1 plus 5-min physician advice and self-help manual ( <i>n</i> = 96) | Group 1<br>Mean drinks/wk§: 21.5 (women); 36.2 (men)<br>Not bingeing: NR<br>Moderate/safe drinking: 21.5%<br><br>Group 2<br>Mean drinks/wk: 24.2 (women); 39.3 (men)<br>Not bingeing: NR<br>Moderate/safe drinking: 22.9% ( <i>P</i> = NS)                                                                                       | Fair: nonrandom assignment, control follow-up not assessed, contamination between interventions, baseline differences not controlled for in all analyses |
| WHO Brief Intervention Study (58)  ¶ (group 1) | 1559 adults age 18–70 y; baseline alcohol consumption: NR                   | Various outpatient medical settings in 8 countries, including United States<br><br>Outcomes assessed at an average of 9 mo | Group 1: 5-min clinician advice                                                                                                                                             | Group 1<br>Mean drinks/wk: NR<br>Not bingeing: NR<br>Moderate/safe drinking: 43% (women); 43% (men)<br><br>Control group<br>Mean drinks/wk: NR<br>Not bingeing: NR<br>Moderate/safe drinking: 35% (women) ( <i>P</i> = NS); 35% (men) ( <i>P</i> < 0.05)                                                                         | Fair: possible noncomparable groups at baseline and follow-up, potential contamination across intervention conditions                                    |
| <b>Brief intervention conditions</b>           |                                                                             |                                                                                                                            |                                                                                                                                                                             |                                                                                                                                                                                                                                                                                                                                  |                                                                                                                                                          |
| Anderson and Scott (54)                        | 154 men age 17–69 y; baseline mean alcohol consumption: 52 drinks/wk        | 8 primary care group practices in United Kingdom<br><br>Outcomes assessed at 12 mo                                         | 10-min clinician advice                                                                                                                                                     | Intervention group<br>Change in mean drinks/wk: –15.7<br>Not bingeing: 77.50%<br>Moderate/safe drinking: 17.50%<br><br>Control group<br>Change in mean drinks/wk: –9.2 ( <i>P</i> = 0.06)<br>Not bingeing: 60.81% ( <i>P</i> < 0.05)<br>Moderate/safe drinking: 5.41% ( <i>P</i> < 0.05)                                         | Good: relatively high attribution levels (31% and 39%), but baseline-forward-replacement of missing values analysis reported                             |
| Maisto et al. (60)  ¶ (group 1)                | 301 adults age ≥21 y; baseline alcohol consumption: 5.5 drinks/drinking day | 12 primary care clinics in the United States<br><br>Outcomes assessed at 12 mo                                             | Group 1: 10- to 15-min advice from research staff                                                                                                                           | Group 1<br>Change in mean drinks/drinking day: –0.79<br>Change in mean drinks/wk: –8.3<br>Not bingeing: NR<br>Moderate/safe drinking: NR<br><br>Control group<br>Change in mean drinks/drinking day: –0.85 ( <i>P</i> = NS)<br>Change in mean drinks/wk: –3.6 ( <i>P</i> = NS)<br>Not bingeing: NR<br>Moderate/safe drinking: NR | Fair: high attribution (23%) without addressing loss to follow-up, unclear blinding, potential contamination between groups                              |
| Nilssen (57)  ¶ (group 1)                      | 338 participants age 12–62 y (mean, 42 y); baseline alcohol consumption: NR | Residents of Tromsø, Norway<br><br>Outcomes assessed at 12 mo                                                              | Feedback given about biological assay results at study-initiated visit                                                                                                      | Group 1<br>Mean alcohol consumption, g/d: 15.6<br>Not bingeing: NR<br>Moderate/safe drinking: NR<br><br>Control group<br>Mean alcohol consumption, g/d: 39.2 ( <i>P</i> < 0.001)<br>Not bingeing: NR<br>Moderate/safe drinking: NR                                                                                               | Fair: unclear allocation concealment, blinding of outcome assessment, possible noncomparable groups at baseline and follow-up                            |
| Scott and Anderson (59)                        | 72 women age 17–69 y; baseline mean alcohol consumption: 35.3 drinks/wk     | 8 primary care group practices in United Kingdom<br><br>Outcomes assessed at 12 mo                                         | 10-min clinician advice                                                                                                                                                     | Intervention group<br>Change in mean drinks/wk: –11.6<br>Not bingeing: 87.9%<br>Moderate/safe drinking: 27%<br><br>Control group<br>Change in mean drinks/wk: –10.0 ( <i>P</i> = NS)<br>Not bingeing: 84.6% ( <i>P</i> = NS)<br>Moderate/safe drinking: 26% ( <i>P</i> = NS)                                                     | Fair: noncomparable groups at baseline, unclear allocation concealment, possible contamination of controls, inadequate power                             |

*Continued on following page*

Table 2—Continued

| Intervention Condition†                           | Population                                                                  | Setting/Duration                                                                                                           | Intervention                                                                                                                                                                             | Outcomes                                                                                                                                                                                                                                                                                                                                                             | Study Quality                                                                                                                                                        |
|---------------------------------------------------|-----------------------------------------------------------------------------|----------------------------------------------------------------------------------------------------------------------------|------------------------------------------------------------------------------------------------------------------------------------------------------------------------------------------|----------------------------------------------------------------------------------------------------------------------------------------------------------------------------------------------------------------------------------------------------------------------------------------------------------------------------------------------------------------------|----------------------------------------------------------------------------------------------------------------------------------------------------------------------|
| Senft et al. (56)                                 | 516 adults age ≥21 y; mean baseline alcohol consumption: 16.5 drinks/wk     | 3 primary care clinics in an HMO in the United States                                                                      | 30-s clinician advice plus 15-min motivational interview with study counselor                                                                                                            | Intervention group<br>Mean drinks/wk: 13.1<br>Not bingeing: 77%<br>Moderate/safe drinking: 80%<br><br>Control group<br>Mean drinks/wk: 14.9 (P = NS)<br>Not bingeing: 77% (P = NS)<br>Moderate/safe drinking: 73.1% (P = 0.07)                                                                                                                                       | Good: although high attribution (20%) (and differentially greater in intervention group), baseline-forward-replacement of missing values showed no effect on results |
| WHO Brief Intervention Study (58)¶ (group 2)      | 1559 adults age 18–70 y; baseline alcohol consumption: NR                   | Various outpatient medical settings in 8 countries, including United States<br><br>Outcomes assessed at an average of 9 mo | Group 2: 15-min advice from health care provider                                                                                                                                         | Group 2<br>Mean drinks/wk: NR<br>Mean cL alcohol/d: males, 5.18; females, 3.39<br>Not bingeing: NR<br>Moderate/safe drinking: males, 43%; females: 39%<br><br>Control group:<br>Mean drinks/wk: NR<br>Mean cL alcohol/d: males, 6.29 (P < 0.001); females, 3.80 (P = NS)<br>Not bingeing: NR<br>Moderate/safe drinking: males, 35% (P < 0.05); females, 35% (P = NS) | Fair: possible noncomparable groups at baseline and follow-up, potential contamination across intervention conditions                                                |
| <b>Brief multicontact intervention conditions</b> |                                                                             |                                                                                                                            |                                                                                                                                                                                          |                                                                                                                                                                                                                                                                                                                                                                      |                                                                                                                                                                      |
| Curry et al. (50)                                 | 307 adults; mean age, 48.2 y; baseline alcohol consumption: 14.9 drinks/wk  | Patients of 23 clinicians in an HMO in the United States<br><br>Outcomes assessed at 12 mo, adjusted for missing data      | ≤5-min motivational clinician message, self-help manual, and up to 3 phone calls from research health educator                                                                           | Intervention group<br>Mean drinks/wk: 10.6<br>Not bingeing: 86%<br>Moderate/safe drinking: 57%<br><br>Control group<br>Mean drinks/wk: 10.6 (P > 0.2)<br>Not bingeing: 81% (P > 0.2)<br>Moderate/safe drinking: 43 (P = 0.048)                                                                                                                                       | Good: high, differential attribution (34% and 22%) addressed by multiple imputation procedure                                                                        |
| Fleming et al. (53)                               | 774 adults age 18–65 y; mean baseline alcohol consumption: 19.1 drinks/wk   | 17 primary care practices in the United States<br><br>Outcomes assessed at 12 mo                                           | 2 brief clinician visits, each followed by phone call from nurse                                                                                                                         | Intervention group<br>Mean drinks/wk: 11.5<br>Not bingeing: 52%<br>Moderate/safe drinking: 84.7%<br><br>Control group<br>Mean drinks/wk: 15.5 (P < 0.001)<br>Not bingeing: 31.7% (P < 0.001)<br>Moderate/safe drinking: 68.9% (P < 0.001)                                                                                                                            | Good: low attribution (10%, slightly differential between groups), baseline-forward-replacement of missing values                                                    |
| Fleming et al. (51)                               | 158 adults age ≥65 y; mean baseline alcohol consumption: 16 drinks/wk       | 24 primary care practices in the United States<br><br>Outcomes assessed at 12 mo                                           | Two 10- to 15-min clinician visits, each followed by phone call from nurse                                                                                                               | Intervention group<br>Mean drinks/wk: 9.9<br>Not bingeing: 69.2%<br>Moderate/safe drinking: 84.6%<br><br>Control group<br>Mean drinks/wk: 16.3 (P < 0.001)<br>Not bingeing: 50.8% (P < 0.025)<br>Moderate/safe drinking: 65.7% (P < 0.005)                                                                                                                           | Good: all criteria met                                                                                                                                               |
| Maisto et al. (60)¶ (group 2)                     | 301 adults age ≥21 y; baseline alcohol consumption: 5.5 drinks/drinking day | 12 primary care clinics in the United States<br><br>Outcomes assessed at 12 mo                                             | 30- to 45-min motivational session with research interventionist plus two 15- to 20-min booster sessions                                                                                 | Group 2<br>Change in mean drinks/drinking day: −0.64<br>Change in mean drinks/wk: −5.5<br>Not bingeing: NR<br>Moderate/safe drinking: NR<br><br>Control group<br>Change in mean drinks/drinking day: −0.85 (P = NS)<br>Change in mean drinks/wk: −3.6 (P = NS)<br>Not bingeing: NR<br>Moderate/safe drinking: NR                                                     | Fair: high attribution (23%) without addressing loss to follow-up, unclear blinding, potential contamination between groups                                          |
| Nilsen (57)¶ (group 2)                            | 338 participants age 12–62 y (mean, 42 y); baseline alcohol consumption: NR | Residents of Tromsø, Norway<br><br>Outcomes assessed at 12 mo                                                              | Feedback given about biological assay results at study-initiated visit; participants invited to repeat visits with laboratory tests until $\gamma$ -glutamyltransferase level normalized | Group 2<br>Mean alcohol consumption, g/d: 13.5<br>Not bingeing: NR<br>Moderate/safe drinking: NR<br><br>Control group<br>Mean alcohol consumption, g/d: 39.2 (P < 0.001)<br>Not bingeing: NR<br>Moderate/safe drinking: NR                                                                                                                                           | Fair: unclear allocation concealment, blinding of outcome assessment, possible noncomparable groups at baseline and follow-up                                        |

Continued on following page

Table 2—Continued

| Intervention Condition† | Population                                                                                           | Setting/Duration                                                                           | Intervention                                                           | Outcomes                                                                                                                                                                                                                                                                                                                                                                  | Study Quality          |
|-------------------------|------------------------------------------------------------------------------------------------------|--------------------------------------------------------------------------------------------|------------------------------------------------------------------------|---------------------------------------------------------------------------------------------------------------------------------------------------------------------------------------------------------------------------------------------------------------------------------------------------------------------------------------------------------------------------|------------------------|
| Ockene et al. (52)      | 530 adults age 21–70 y; mean baseline alcohol consumption: 18.9 drinks/wk                            | 4 primary care sites (93 clinicians) in the United States<br><br>Outcomes assessed at 6 mo | 5- to 10-min tailored consultation with clinician plus follow-up visit | Intervention group<br>Change in mean drinks/wk: –6.0<br>Not bingeing: 31%<br>Not bingeing and moderate/safe drinking: 38.7%<br><br>Control group<br>Change in mean drinks/wk: –3.1 ( $P = 0.003$ )<br>Not bingeing: 26% ( $P = NS$ )<br>Not bingeing and moderate/safe drinking: 28.3% ( $P < 0.05$ )                                                                     | Good: met all criteria |
| Wallace et al. (55)‡    | 909 adults age 17–69 y; mean baseline alcohol consumption: 35.1 (females) and 62.2 (males) drinks/wk | 47 group practices in England and Scotland                                                 | 1 or 2 visits with clinician with up to 5 visits as needed             | Intervention group<br>Mean drinks/wk: females, 23.6; males, 44.0<br>Binge/heavy episodes: NR<br>Moderate/safe drinking: females, 47.7%; males, 43.7%<br><br>Control group<br>Mean drinks/wk: females, 30.4 ( $P < 0.05$ ); males: 55.6 ( $P < 0.001$ )<br>Binge/heavy episodes: NR<br>Moderate/safe drinking: females, 29.2% ( $P < 0.05$ ); males, 25.5% ( $P < 0.001$ ) | Good: met all criteria |

\* HMO = health maintenance organization; NR = outcome not reported; NS = reported as non-statistically significant in study; WHO = World Health Organization.  
 † Includes 15 intervention conditions from 12 studies. Multiple intervention groups from Maisto (60), Nilssen (57), and WHO (58) are further detailed in Appendix Table 3. Intervention definitions: “very brief” interventions include up to 5 minutes at initial contact with no follow-up contacts; “brief” interventions include up to 15 minutes at initial contact with no follow-up contact; “brief multicontact” interventions include up to 15 minutes at initial contact with multiple follow-up contacts.

‡ This study contributed 2 minimal intervention conditions, designated here as group 1 and group 2.

§ Mean drinks per week was reported as change scores from baseline for Ockene (52), Anderson and Scott (54), Maisto (60), and Scott and Anderson (59). Two studies—Nilssen (57) and WHO (58)—did not report mean drinks per week but did report average daily consumption measures, with some statistically significant between-group differences (Appendix Table 3).

|| Trial results considered in 1996 U.S. Preventive Services Task Force recommendation for screening to detect problem drinking.

¶ This study reported 2 intervention conditions—designated here as group 1 and group 2—and 1 control.
